# Supplementary material for: Macroecological drivers of archaea and bacteria in benthic deep-sea ecosystems
Source: PubMed Central journal article supplement — Sci Adv. 2016 Apr 29;2(4):e1500961. doi: 10.1126/sciadv.1500961 (PMC4928989; doi:10.1126/sciadv.1500961), 2016-04-29

## Supplementary Materials for

### **Macroecological drivers of archaea and bacteria in benthic deep-sea ecosystems**

Roberto Danovaro, Massimiliano Molari, Cinzia Corinaldesi, Antonio Dell'Anno

Published 29 April 2016, *Sci. Adv.* **2**, e1500961 (2016)

DOI: 10.1126/sciadv.1500961

#### **The PDF file includes:**

- Supplementary Materials and Methods
- table S1. Details of the station locations, temperature, and salinity of bottom waters, total phytopigment (CPE) and biopolymeric C (BPC) concentrations, and protein-to-carbohydrate ratio (PRT/CHO) in surface sediments (0 to 1 cm), net photosynthetic primary production (NPP), and organic C fluxes (OC fluxes).
- table S2. Output of the in silico analysis dealing with the coverage of probes targeting 16S rRNA used in the present study.
- table S3. Statistical analysis testing for differences in the distribution of the different microbial components.
- fig. S1. Depth-related patterns of total prokaryotic abundances (obtained using SYBR Green I) in the top 1 cm of sediments collected in the different oceanic regions.
- fig. S2. Comparison of the abundances of bacteria and archaea obtained by CARD-FISH, with the number of 16S rDNA copies of bacteria and archaea obtained in surface sediments of different oceanic regions.
- fig. S3. Output of the regression tree analysis carried out to identify environmental factors explaining the distribution of MG-I Thaumarchaeota in the top 1 cm of sediments collected in the different oceanic regions.
- fig. S4. Output of the regression tree analysis carried out to identify environmental factors explaining the distribution of MG-II Euryarchaeota in the top 1 cm of sediments collected in the different oceanic regions.

## Supplementary Material and Methods

**Sample collection and processing.** Sediment samples were collected during seven oceanographic cruises conducted in the Arctic Ocean (July-August 2005), Atlantic Ocean (August 2005, June-July 2006 and September 2006) and Mediterranean Sea (August 2005, October 2005 and June 2006). In each sampling area, sediment samples were collected along a bathymetric transect at fixed depths using a hierarchical sampling strategy. At each sampling site, the top 15 cm of sediment was collected from independent multiple-corer deployments ( $n=3$ ) for the analyses of microbial variables and biochemical composition of organic matter (in terms of chlorophyll-a and phaeopigment and protein, carbohydrate and lipid content). Sediment cores were sliced into horizons of 0-1 cm, 3-5 cm and 10-15 cm. Overall 228 samples were collected, including 174 samples from the 0-1 cm sediment horizon, 27 samples from the 3-5 cm sediment horizon and 27 samples from the 10-15 cm sediment horizon. Samples from the 3-5 cm and 10-15 cm sediment horizons were collected at three benthic deep-sea sites in the Arctic margin (located at 1279 m, 2545 m and 5570 m depth), two sites in the Atlantic margin (located at 1002 m and 2130 m depth) and four sites in the Mediterranean Sea (at 985 m and 2342 m depth in the NW Mediterranean and at 1263 m and 2325 m depth in the Central Mediterranean). For the determination of prokaryotic abundance, sediment samples were fixed in buffered formaldehyde (2%) and kept at 4°C until further laboratory analyses. For the analysis of the prokaryotic assemblage structure by catalysed reporter deposition–fluorescence in situ hybridisation (CARD-FISH), sediment samples were fixed with 2% paraformaldehyde (polymerised formaldehyde, dry chemical), washed with phosphate-buffered saline solution (137 mM NaCl, 2.7 mM KCl, 10 mM Na<sub>2</sub>HPO<sub>4</sub>, 2mM KH<sub>2</sub>PO<sub>4</sub>, pH 7.6), and then stored in phosphate-buffered saline solution: 96% ethanol (1:1) at -20°C until further processing. The samples for qPCR analyses and the determination of the biochemical composition of organic matter were immediately frozen and stored at -20°C until further laboratory analyses.

**table S1.** Details of the station locations, temperature, and salinity of bottom waters, total phytopigment (CPE) and biopolymeric C (BPC) concentrations, and protein-to-carbohydrate ratio (PRT/CHO) in surface sediments (0 to 1 cm), net photosynthetic primary production (NPP), and organic C fluxes (OC fluxes). Standard deviations ( $\pm$ ) are reported (n=3). na= not available.

| Area           | Latitude<br>(°N) | Longitude<br>(°E) | Depth<br>(m) | Temperatura<br>(°C) | Salinity | CPE<br>( $\mu\text{g g}^{-1}$ ) | BPC<br>( $\text{mg C g}^{-1}$ ) | PRT/CHO | NPP<br>( $\text{mg C m}^{-2} \text{d}^{-1}$ ) | OC fluxes<br>( $\text{mg C m}^{-2} \text{d}^{-1}$ ) |
|----------------|------------------|-------------------|--------------|---------------------|----------|---------------------------------|---------------------------------|---------|-----------------------------------------------|-----------------------------------------------------|
| Arctic Ocean   | 79.1334          | 6.0928            | 1279         | -0.74               | 34.89    | 32.3 $\pm$ 9.6                  | 8.0 $\pm$ 0.9                   | 1.4     | 2429                                          | 64.6                                                |
|                | 79.1081          | 4.6004            | 1914         | -0.83               | 34.91    | 13.8 $\pm$ 2.0                  | 3.3 $\pm$ 0.3                   | 0.7     | 1935                                          | 40.0                                                |
|                | 78.6098          | 5.0700            | 2338         | -0.90               | 34.91    | 11.9 $\pm$ 3.4                  | 4.0 $\pm$ 0.6                   | 0.4     | 882                                           | 16.2                                                |
|                | 79.0651          | 4.1801            | 2462         | -0.90               | 34.90    | 10.5 $\pm$ 2.6                  | 2.8 $\pm$ 0.2                   | 0.7     | 1061                                          | 18.8                                                |
|                | 79.1336          | 2.8424            | 2545         | -0.84               | 34.92    | 16.0 $\pm$ 2.5                  | 4.2 $\pm$ 0.5                   | 0.7     | 615                                           | 10.7                                                |
|                | 79.0634          | 3.6580            | 3158         | -0.90               | 34.90    | 3.1 $\pm$ 0.8                   | 2.8 $\pm$ 0.5                   | 1.1     | 1053                                          | 16.1                                                |
|                | 79.0600          | 3.5815            | 3485         | -0.72               | 34.49    | 3.4 $\pm$ 1.5                   | 1.1 $\pm$ 0.2                   | 1.4     | 1054                                          | 15.2                                                |
|                | 79.0650          | 4.1796            | 3997         | -0.67               | 34.93    | 10.1 $\pm$ 5.6                  | 2.7 $\pm$ 0.5                   | 1.6     | 1166                                          | 15.5                                                |
|                | 79.0643          | 3.3360            | 5108         | -0.55               | 34.92    | 4.5 $\pm$ 1.1                   | 1.6 $\pm$ 0.3                   | 2.9     | 895                                           | 10.3                                                |
|                | 79.1336          | 2.8424            | 5571         | -0.51               | 34.82    | 22.3 $\pm$ 7.3                  | 5.9 $\pm$ 0.8                   | 1.4     | 689                                           | 7.6                                                 |
| Atlantic Ocean | 55.650           | -15.9333          | 469          | 10.00               | 35.46    | 2.9 $\pm$ 0.6                   | na                              | na      | 1258                                          | 64.8                                                |
|                | 55.452           | -15.7661          | 1091         | 6.77                | 35.16    | 3.3 $\pm$ 0.7                   | 0.6 $\pm$ 0.1                   | 0.2     | 1271                                          | 37.4                                                |
|                | 55.373           | -15.6531          | 1488         | 6.00                | 34.96    | 1.5 $\pm$ 0.3                   | 0.3 $\pm$ 0.02                  | 0.1     | 1328                                          | 32.1                                                |
|                | 55.208           | -15.7793          | 1958         | 3.50                | 34.92    | 8.7 $\pm$ 1.5                   | 0.8 $\pm$ 0.1                   | 0.3     | 1299                                          | 26.5                                                |
|                | 55.082           | -15.7722          | 2459         | 2.00                | 34.94    | 39.0 $\pm$ 15.9                 | 2.4 $\pm$ 0.3                   | 0.6     | 1609                                          | 28.6                                                |
|                | 40.1667          | -9.6671           | 416          | 11.35               | 35.55    | 3.7 $\pm$ 0.1                   | 0.34 $\pm$ 0.1                  | 0.7     | 1144                                          | 64.0                                                |
|                | 40.1667          | -9.8333           | 959          | 10.69               | 36.09    | 3.8 $\pm$ 1.0                   | 0.7 $\pm$ 0.1                   | 1.1     | 947                                           | 30.3                                                |
|                | 40.1668          | -9.9333           | 1463         | 8.59                | 35.88    | 4.9 $\pm$ 0.8                   | 0.9 $\pm$ 0.2                   | 0.7     | 907                                           | 22.2                                                |
|                | 40.1667          | -9.9998           | 3475         | 2.57                | 34.84    | 6.5 $\pm$ 2.6                   | 1.3 $\pm$ 0.2                   | 1.2     | 838                                           | 12.1                                                |
|                | 40.1665          | -10.1669          | 3981         | 2.52                | 34.82    | 9.5 $\pm$ 1.1                   | 2.2 $\pm$ 0.5                   | 0.6     | 714                                           | 9.5                                                 |
|                | 40.6014          | -10.3681          | 3416         | 2.61                | 34.92    | 3.9 $\pm$ 0.2                   | 2.3 $\pm$ 0.4                   | 0.5     | 640                                           | 9.4                                                 |
|                | 40.0778          | -10.3756          | 4277         | 2.48                | 34.90    | 7.5 $\pm$ 0.5                   | 2.5 $\pm$ 0.3                   | 0.5     | 731                                           | 9.4                                                 |
|                | 40.1668          | -10.9999          | 4902         | 2.47                | 34.86    | 3.4 $\pm$ 1.2                   | 2.0 $\pm$ 0.2                   | 0.5     | 508                                           | 6.0                                                 |
|                | 39.6135          | -9.1904           | 458          | na                  | na       | 46.9 $\pm$ 2.9                  | 2.6 $\pm$ 0.7                   | 1.3     | 2087                                          | 109.3                                               |
|                | 39.5803          | -9.4253           | 740          | na                  | na       | 34.6 $\pm$ 0.2                  | na                              | na      | 1297                                          | 49.2                                                |
|                | 39.5968          | -9.4038           | 897          | na                  | na       | 42.1 $\pm$ 2.2                  | 2.7 $\pm$ 0.5                   | 1.1     | 1253                                          | 41.9                                                |
|                | 39.5040          | -9.8434           | 3231         | 2.63                | 34.87    | 21.7 $\pm$ 2.3                  | 2.1 $\pm$ 0.3                   | 0.9     | 854                                           | 12.9                                                |
|                | 39.5000          | -9.9403           | 3530         | 2.54                | 34.92    | 47.9 $\pm$ 1.6                  | na                              | na      | 674                                           | 9.7                                                 |
|                | 39.5942          | -10.3211          | 4340         | 2.48                | 34.14    | 23.7 $\pm$ 2.7                  | na                              | na      | 677                                           | 8.6                                                 |
|                | 39.5934          | -10.3334          | 4363         | 2.49                | 34.80    | 20.0 $\pm$ 7.4                  | 2.1 $\pm$ 0.5                   | 0.8     | 716                                           | 9.1                                                 |

|                          |          |          |       |       |       |             |           |      |      |      |
|--------------------------|----------|----------|-------|-------|-------|-------------|-----------|------|------|------|
|                          | 38.4935  | -9.4788  | 445   | 11.85 | 35.74 | 36.2 ± 6.9  | 3.4 ± 0.3 | 0.9  | 1511 | 80.7 |
|                          | 38.4652  | -9.4749  | 1021  | 12.05 | 36.28 | 54.8 ± 13.4 | 2.7 ± 0.4 | 1.5  | 1501 | 46.1 |
|                          | 38.3631  | -9.5096  | 2100  | 4.77  | 35.20 | 31.8 ± 3.6  | 2.3 ± 0.4 | 1.3  | 1689 | 33.0 |
|                          | 38.3115  | -9.7025  | 2975  | 2.85  | 34.95 | 13.4 ± 3.1  | 1.7 ± 0.1 | 1.3  | 1211 | 19.2 |
|                          | 38.3333  | -9.8584  | 3914  | 2.48  | 34.91 | 8.7 ± 0.8   | 1.6 ± 0.2 | 0.5  | 987  | 13.3 |
|                          | 38.3558  | -9.9789  | 4513  | 2.50  | 34.09 | 16.2 ± 3.5  | 3.5 ± 0.5 | 0.7  | 699  | 8.7  |
|                          | 38.4168  | -10.0833 | 4689  | 2.51  | 34.90 | 3.8 ± 2.5   | 0.9 ± 0.2 | 0.5  | 529  | 6.4  |
|                          | 37.83283 | -8.48533 | 1002  | 11.6  | 36.29 | 10.5 ± 6.0  | 1.7 ± 0.3 | 0.5  | 541  | 16.8 |
|                          | 37.83333 | -8.25000 | 2130  | 5.45  | 35.34 | 7.8 ± 3.5   | 1.3 ± 0.2 | 1.1  | 538  | 10.4 |
|                          | 37.8333  | -9.91667 | 2908  | 2.75  | 34.95 | 9.0 ± 0.9   | 1.6 ± 0.3 | 0.7  | 1398 | 22.5 |
|                          | 37.8336  | -10.5001 | 3908  | 2.43  | 34.88 | 2.8 ± 0.6   | 1.3 ± 0.3 | 0.7  | 451  | 6.1  |
|                          | 37.8334  | -11.0002 | 4987  | 2.55  | 34.90 | 6.9 ± 2.2   | 1.1 ± 0.2 | 1.1  | 401  | 4.7  |
| <b>Mediterranean Sea</b> | 42.1475  | 3.5843   | 398   | 13.34 | 38.49 | 12.4 ± 0.7  | 2.9 ± 0.5 | 1.2  | 661  | 38.1 |
|                          | 42.1287  | 3.7772   | 985   | 13.02 | 38.45 | 2.9 ± 0.6   | 0.9 ± 0.1 | 0.3  | 584  | 18.4 |
|                          | 42.1175  | 4.0457   | 1887  | 13.07 | 38.44 | 1.5 ± 0.2   | 1.3 ± 0.2 | 0.4  | 533  | 11.1 |
|                          | 42.0797  | 4.6817   | 2342  | 13.10 | 38.43 | 9.5 ± 2.0   | 2.4 ± 0.5 | 0.8  | 544  | 10.0 |
|                          | 36.9001  | 15.2733  | 607.4 | na    | na    | 22.1 ± 3.1  | 2.6 ± 0.3 | 3.9  | 339  | 14.7 |
|                          | 36.8714  | 15.3386  | 1263  | 13.60 | 38.57 | 9.4 ± 2.0   | 1.7 ± 0.3 | 1.6  | 318  | 8.5  |
|                          | 36.8491  | 15.3411  | 2062  | 13.65 | 38.53 | 9.0 ± 5.6   | 1.8 ± 0.2 | 5.4  | 318  | 6.3  |
|                          | 36.8177  | 15.3625  | 2325  | 13.10 | 38.50 | 16.8 ± 2.6  | 2.8 ± 0.4 | 0.9  | 333  | 6.1  |
|                          | 34.9835  | 23.8095  | 520   | 14.17 | 38.83 | na          | na        | na   | 218  | 10.5 |
|                          | 35.0113  | 23.6971  | 1081  | 13.70 | 38.75 | 12.2 ± 1.2  | 1.3 ± 0.3 | 0.1  | 228  | 6.8  |
|                          | 35.0281  | 23.6143  | 1903  | 13.70 | 38.70 | 19.1 ± 3.2  | 1.0 ± 0.3 | 0.2  | 228  | 4.7  |
|                          | 35.1475  | 23.7142  | 2420  | 13.50 | 38.76 | 12.9 ± 2.6  | 0.9 ± 0.1 | 0.2  | 218  | 3.9  |
|                          | 35.0847  | 23.5536  | 3553  | 13.60 | 38.75 | 23.5 ± 4.7  | 1.2 ± 0.2 | 0.2  | 228  | 3.3  |
|                          | 35.0524  | 23.4921  | 3600  | 13.60 | 38.65 | 24.2 ± 5.1  | 1.5 ± 0.4 | 0.3  | 228  | 3.2  |
|                          | 34.7244  | 24.1280  | 507   | 13.90 | 38.85 | 24.4 ± 15.2 | 0.8 ± 0.1 | 0.4  | 206  | 10.1 |
|                          | 34.6031  | 24.1426  | 3617  | na    | na    | 38.3 ± 0.9  | 0.9 ± 0.2 | 0.02 | 175  | 2.5  |

**table S2.** Output of the in silico analysis dealing with the coverage of probes targeting 16S rRNA used in the present study. For each probe, it is shown the comparison between the percentages of coverage with 0 and 1 mismatch and the relative sequences (in brackets) obtained using the updated SILVA database at June 2015.

| <b>Probe</b> | <b>Sequence 5'-3'</b> | <b>Target</b>             | <b>Coverage (no mismatch)</b> | <b>Coverage (one mismatch)</b> |
|--------------|-----------------------|---------------------------|-------------------------------|--------------------------------|
| EUB338-I     | GCTGCCTCCCGTAGGAGT    | <i>Bacteria</i>           | 76% (343904)                  | 80% (362065)                   |
| EUB338-II    | GCAGCCACCCGTAGGTGT    | <i>Planctomycetales</i>   | 72% (2981)                    | 74% (3061)                     |
| EUB338-III   | GCTGCCACCCGTAGGTGT    | <i>Verrucomicrobiales</i> | 84% (938)                     | 86% (959)                      |
| NONEUB       | ACTCCTACGGGAGGCAGC    | Negative control          | -                             | -                              |
| ARCH915      | GTGCTCCCCCGCCAATTCCT  | <i>Archaea</i>            | 72% (13408)                   | 79% (14779 )                   |
| CRN537       | TGACCACTT AGGTGCTG    | <i>Marine Group I</i>     | 68% (1545)                    | 74% (1663)                     |
| EURY806      | CACAGCGTTTACACCTAG    | <i>Marine Group II</i>    | 71% (248)                     | 73%(357)                       |

**table S3. Statistical analysis testing for differences in the distribution of the different microbial components.** Output of the PERMANOVA analysis testing for differences in the abundances of bacteria (A), archaea (B), *MG-I Thaumarchaeota* (C) and *MG-II Euryarchaeota* (D) in the top 1 cm of deep-sea sediments of the different oceanic regions and sampling areas investigated. \*\*\* P<0.001, \*\*P<0.01, \*P<0.05, ns=not significant. The output of post-hoc tests is also reported.

| <b>A) Bacteria</b>                   |           |           |                 |          |                                  |
|--------------------------------------|-----------|-----------|-----------------|----------|----------------------------------|
| <b>Factor</b>                        | <b>df</b> | <b>MS</b> | <b>Pseudo-F</b> | <b>P</b> | <b>Post-hoc</b>                  |
| Oceanic region                       | 2         | 1.19      | 4.69            | **       | Arctic > Atlantic, Mediterranean |
| Area                                 | 3         | 0.30      | 1.21            | ns       |                                  |
| Residual                             | 51        | 0.25      |                 |          |                                  |
| Total                                | 56        |           |                 |          |                                  |
| <b>A) Archaea</b>                    |           |           |                 |          |                                  |
| <b>Factor</b>                        | <b>df</b> | <b>MS</b> | <b>Pseudo-F</b> | <b>P</b> | <b>Post-hoc</b>                  |
| Oceanic region                       | 2         | 11.44     | 17.44           | ***      | Arctic > Atlantic, Mediterranean |
| Area                                 | 3         | 1.03      | 1.57            | ns       |                                  |
| Total                                | 51        | 0.66      |                 |          |                                  |
| Oceanic region                       | 56        |           |                 |          |                                  |
| <b>C) <i>MG-I Thaumarchaeota</i></b> |           |           |                 |          |                                  |
| <b>Factor</b>                        | <b>df</b> | <b>MS</b> | <b>Pseudo-F</b> | <b>P</b> | <b>Post-hoc</b>                  |
| Oceanic region                       | 2         | 13.86     | 15.36           | ***      | Arctic > Atlantic, Mediterranean |
| Area                                 | 3         | 0.71      | 0.79            | ns       |                                  |
| Residual                             | 51        | 0.90      |                 |          |                                  |
| Total                                | 56        |           |                 |          |                                  |
| <b>D) <i>MG-II Euryarchaeota</i></b> |           |           |                 |          |                                  |
| <b>Factor</b>                        | <b>df</b> | <b>MS</b> | <b>Pseudo-F</b> | <b>P</b> | <b>Post-hoc</b>                  |
| Oceanic region                       | 2         | 7.29      | 9.34            | ***      | Arctic > Atlantic, Mediterranean |
| Area                                 | 3         | 1.78      | 2.28            | ns       |                                  |
| Residual                             | 51        | 0.78      |                 |          |                                  |
| Total                                | 56        |           |                 |          |                                  |

**fig. S1. Depth-related patterns of total prokaryotic abundances (obtained using SYBR Green I) in the top 1 cm of sediments collected in the different oceanic regions. Means and standard deviations (n = 3) are reported.**

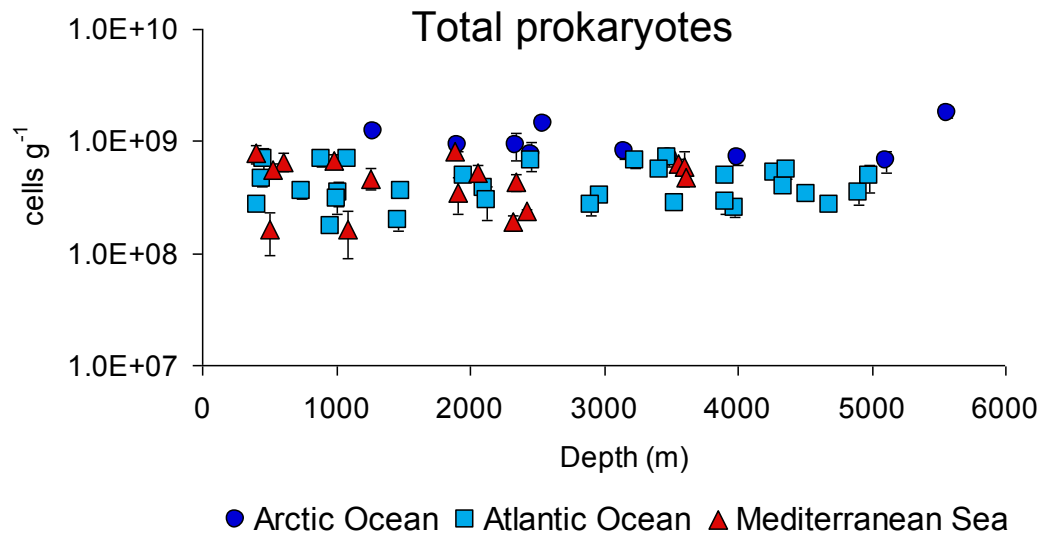

**fig. S2. Comparison of the abundances of bacteria and archaea obtained by CARD-FISH, with the number of 16S rDNA copies of bacteria and archaea obtained in surface sediments of different oceanic regions. (A) Comparison between bacterial abundances and the number of bacterial 16S rDNA copies; (B) Comparison between archaeal abundances and the number of archaeal 16S rDNA copies. Means and standard deviations (n = 3) are reported.**

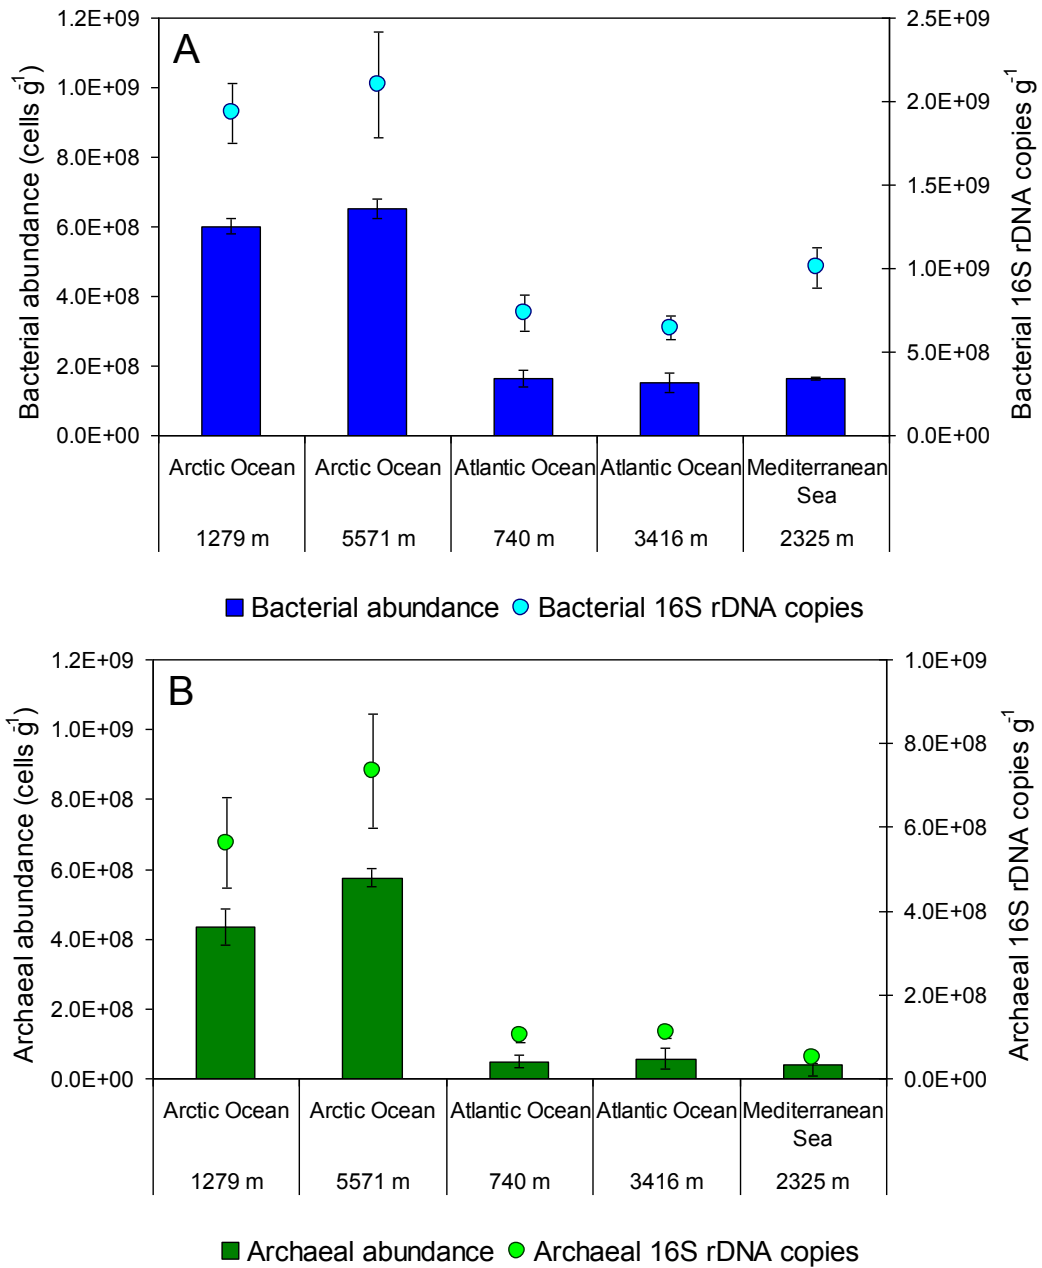



**fig. S3.** Output of the regression tree analysis carried out to identify environmental factors explaining the distribution of MG-I Thaumarchaeota in the top 1 cm of sediments collected in the different oceanic regions. The significance level and the percentage of the explained variance of the predictor variable is reported along with the number of sampling sites for each oceanic region at the terminal nodes.

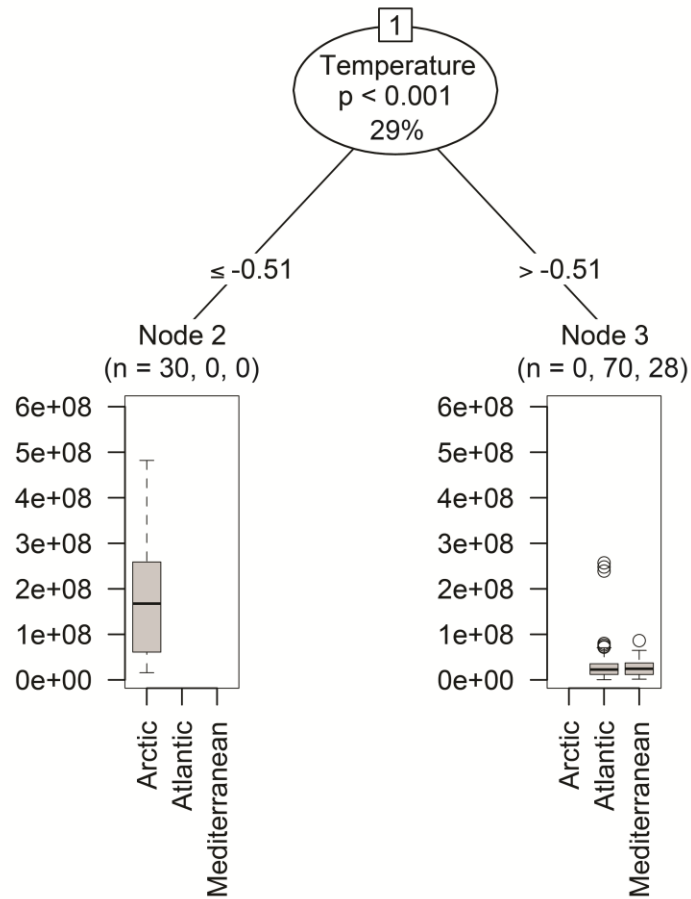

**fig. S4.** Output of the regression tree analysis carried out to identify environmental factors explaining the distribution of MG-II Euryarchaeota in the top 1 cm of sediments collected in the different oceanic regions. The significance level and the percentage of the explained variance of each predictor variable is reported along with the number of sampling sites for each oceanic region at the terminal nodes. OC flux = organic C that reaches the seafloor through particle sinking (expressed as mg C m<sup>-2</sup> d<sup>-1</sup>); BPC= Biopolymeric C concentrations in the sediment (expressed as mg C g<sup>-1</sup>); PRT:CHO= protein to carbohydrate ratio in the sediment (adimensional).

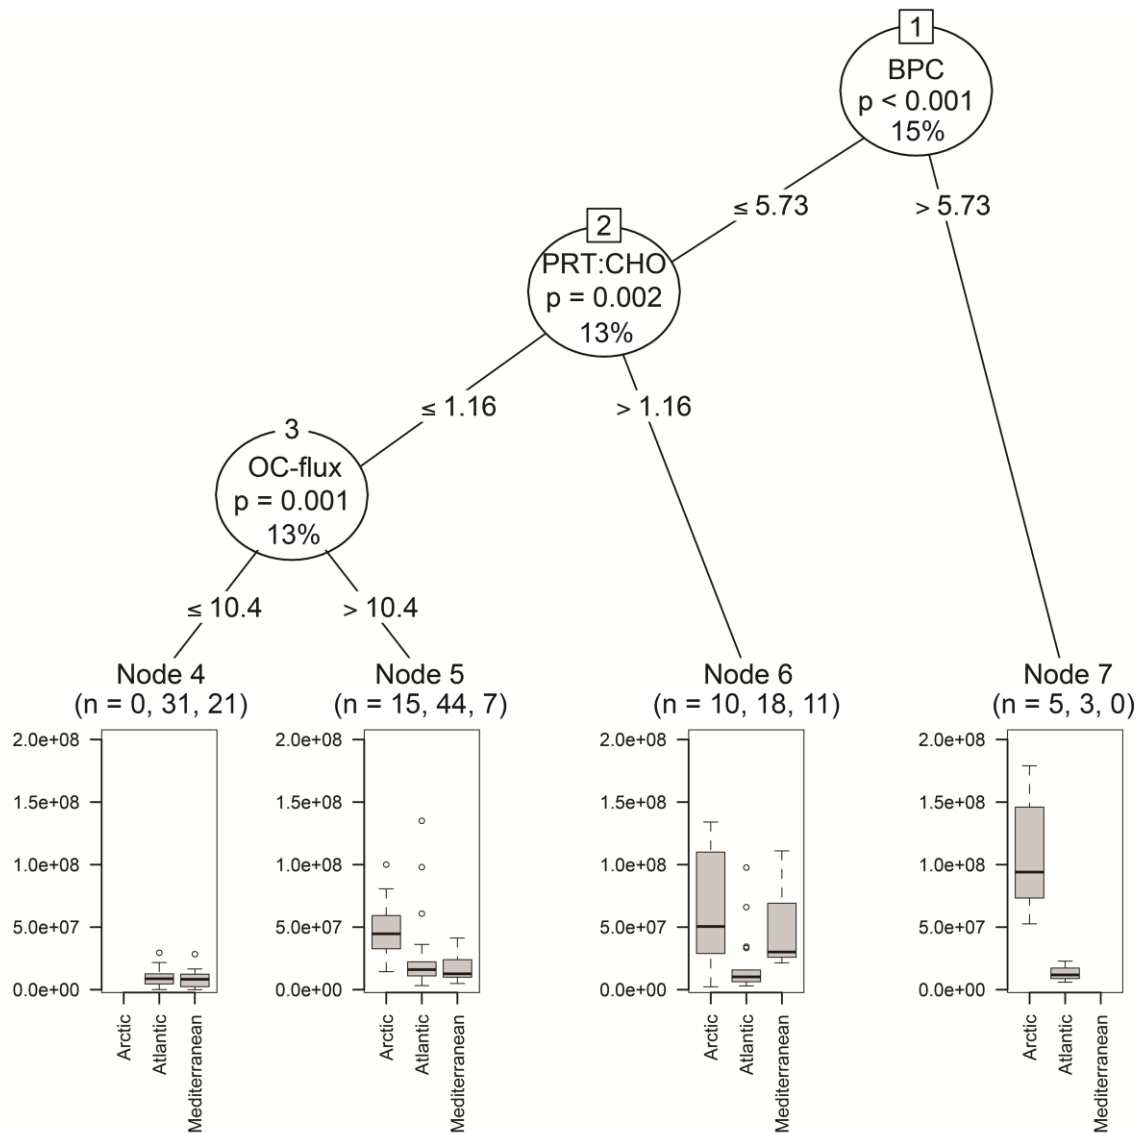

Supplement: 1500961_SM.pdf [file 1500961_SM.pdf]
